# Supplementary material for: A global data set of soil hydraulic properties and sub-grid variability of soil water retention and hydraulic conductivity curves
Source: Copernicus journal article supplement (doi:10.5194/essd-2017-13), 2017-02-23
Supplement: Supplementary file [file essd-2017-13-AC1-supplement.pdf]

## Reply to comments of reviewer No. 1

### Comment:

Overall, a data set of very high quality and strong usefulness. Very good fit to this journal. Good descriptions and very good explanations. Data set downloads easily from Pangaea.

### Reply:

We thank the reviewer for his very positive evaluation and his constructive comments.

### Comment:

Some additional explanation of the netCDF data files would help. The 'Schaap' in the filename refers to application of the ROSETTA PTF (reference Schaap) but implies that one might in the future encounter a parallel data set produced using some other PTF strategy?

### Reply:

We added the file naming convention to the manuscript. The reviewer is right that we plan to provide also further data sets for alternative PTFs, especially to extend the application for models using Brooks-Corey.

### Comment:

And the 'sl' refers to soil level but it took me a while to confirm that. Some clearer naming or readme file could better help link these individual files to this description?

### Reply:

We added the file naming convention to the manuscript.

### Comment:

A few other comments and suggestions:

Many instances e.g page 2 line 24 where sequence of references lacks needed spaces between references (e.g Dimitrov et al., 2014;Jadoon et al., 2012;Montzka et al., 2011). This comes from the bibliometric software used by the authors. They should fix the problem rather than relying on proofreaders to catch all these small formatting errors?

### Reply:

We are sorry for this inconvenience but this seems to be caused by the Endnote style file provided by the journal. We will check this with the journal.

### Comment:

On page 4, line 8, the use of the phrase 'character size' in this sentence opens some confusion? Earlier in the sentence the authors wrote about hydraulic characteristics but here 'character' size refers to the magnitude of a soil property? Or to grain size characteristics or pore size characteristics. The reader doesn't understand what the authors intend here.

### Reply:

We modified the sentence to: "...under the condition that the internal geometry of the system only differs by size"

### Comment:

On page 6 lines 20 to 26 the MvG factors  $\alpha$  and  $n$  are introduced as scaling factors. But in fact both terms derive from measurable soil properties? Fundamental physical parameters then applied as descriptive (e.g. scaling) factors? One gets the impression here that soil scientists use them for mathematical convenience, not as measured properties.

### Reply:

The reviewer is right that both parameters can be estimated from measurements of the pairs of water content and pressure head. Therefore, they are generally assumed to be intrinsic soil physical parameters. Unfortunately, the second statement is not right. We did not use them only for mathematical convenience. What we have done (and it seems that the reviewer got the message right during the course of reading) is that the alpha value will be scaled by an additional factor introduced – the scaling factor lambda. As this is common theory in scaling we believe that this does not need any further discussion or explanation.

Additionally, the entire scaling concept has been extensively described in the manuscript and no additional queries have been raised by any of the reviewers.

Comment:

Figure 1 provides a very useful graphical map of the data processing. Likewise the manuscript itself provides very useful, well-documented descriptions.

Reply:

Thank you.

Comment:

But, as the authors know, and as careful reading exposes, the processes used here to assemble the global reference data set and then to support - statistically - up-scaling to GCM grid scales both rely on and introduce some additional uncertainty? Having - and plotting in geographic space - the variance terms will as the authors say prove very valuable, but calculating variances does not remove or explain underlying uncertainties? This comment does not criticise the work, only suggest that, perhaps in a short paragraph in the conclusions, the authors assemble some of the uncertainty terms they have mentioned throughout the manuscript, as useful reminder to (perhaps) less-familiar users about the need for some caution. This cautionary paragraph could include the scaling uncertainty (page 4), the fact that the authors have (probably correctly) used mean values rather than full confidence interval data from the SoilGrids source (page 6), that they derive HCC from WRC rather than calculating independently (another necessary choice but a choice none-the-less, e.g page 8), their hypothesis / expectation that variance scales with spatial resolution (page 10), that they report here only data from top-most soil layers (page 11), that they recognise deficiencies in application of global PFT to specific boreal soils (again page 11), etc. Again, the authors have presented and defended good choices necessary to make a very good product! But, as part of their conclusions, they should remind readers / users of the uncertainties avoided or introduced by those choices. A short addition to the conclusion section?

Reply:

In order to clarify all listed sources of uncertainty, we introduced a new section 3.4.

Comment:

Page 10, lines 3, 4 - some numbering problems in this section? '(ii)' used twice?

Reply:

Corrected.

Comment:

Page 10, line 9 - 'VGM' a new term (if so need definition) or in fact a typo of MvG?

Reply:

Corrected.

Comment:

Page 14, lines 14, 15 - this sentence "On the other hand, the relative decrease of variance with coarser resolution for this region is compared to the other ones (Figure 11 right panel)." The authors mean to write 'comparable' rather than "compared"?

Reply:

Indeed, corrected.

Comment:

Figures 2, 4 - Very useful plots of this 0.25 degree product on top of the original 1km SoilGrids product. But the authors have chosen sand fraction and a very compressed colour scale in both figures. Does sand fraction represent the obvious comparison parameter for both German and global sites? Figure 3 indicates that most variance in soil properties for the German sites occurs along the sand-silt axis but from the compressed colour scales we can't tell whether the final product can distinguish 20%, 50%, 80%, etc.

Reply:

We have chosen the sand fraction to exemplarily present the heterogeneity within the  $0.25^\circ$  grid cell and also within the example regions to analyze the scaling variance loss. Therefore, the variability is important, not the absolute sand fraction magnitude.

Comment:

Figures 5, 6 - This may represent a too-simple visual-only analysis, but I think the authors with their descriptive text for these two figures have allowed a question to arise. Given the distinctly higher (relative to other large regions of the planet) variance (visual, not calculated!) in soil hydraulic properties in the region across north Africa (no other large region shows such consistent extreme values in 5 top through bottom), and the authors's plausible explanation of a strong wet-dry seasonal signal in the Sahel (page 14) and predominance of sandy soils in the Sahara (page 12), wouldn't we expect distinctly high values of scaling variance at least across the zonal boundaries of that north African region (e.g. Figure 11 left)? It might be very useful to have the regional boxes from Figure 4 reproduced in Figure 6? Perhaps north Africa represents a region of hydrologic extremes but of relative spatial homogeneity in soil properties? Or a region of relative data sparsity? Perhaps these figures will provoke similar questions from other readers?

Reply:

In the global maps of  $\alpha_n$ , etc. in Figure 5 the clear differentiation between Sahara and Sahel is visible. If the spatial resolution of the target grid is very coarse (e.g.  $>500\text{km}$ ), we of course expect high scaling variance at the zonal boundaries from Sahara to Sahel. However, here we calculate the scaling variance for a  $0.25^\circ$  grid where the transition zone with  $>500\text{km}$  is of too large scale that the  $0.25^\circ$  grid can capture this phenomenon. In this case, more smaller scale processes contribute to the sub-grid variability, e.g. related to river networks, volcanic activity and heterogeneous glacial processes.

Comment:

Figure 7, 8 and 9. This reader finds these plots very useful! But, if averaging the MvG parameters represents the preferred approach, at least from this work, shouldn't the conclusions (top paragraph of page 15) and these figures make a strong case? In the narrative and in the graphics? A clearer graphical and textual message could better promote the strong outcomes of this work?

Reply:

We respectfully disagree that we stated that MvG parameter averaging should be the preferred approach. In general, it is known that MvG parameters should NOT be averaged (nor in the lab neither in the field). Therefore, we introduced the entire methodology to average retention pairs and use the scaling factor to capture some of the uncertainty associated. Nevertheless, we included MvG averaging as a reference (because MvG averaging seems still a choice for some researchers not being deeply in soil physics). We again checked the manuscript and did not found at any place that MvG averaging is the preferable method.

Comment:

Figure 11 - here again the distinct question about Africa emerges. Figure 11 left shows very high values for Africa but, to this reader's eye at least, Figure 6 does not support this?

Reply:

Figure 6 cannot support the high variability in Africa, because it was developed for presenting the scaling variance at  $0.25^\circ$  grid only. The blue box in Figure 4 is the extent we analyze in Figure 11, where we use different grid spacings to estimate a scaling relationship between resolution and sub-grid variance. We clarified this in the manuscript.

Comment:

Figure 11 right presents some very interesting challenges. In the figure, and in the supporting text (page 14, lines 19 to 21), scaling variance remains quite large (the authors use the word 'conserved') out to 100 km? A default resolution for earth system models used in CMIP6

might be 100 km. Some modelling centres will run higher resolution at perhaps 25 km globally. Ensemble work at global scales - which could and should take advantage of the variances recorded in this data set - will almost certainly occur with 100 km (or larger) resolution. In those 25 km to 100 km spatial ranges, for these soil properties, the upscaled products preserve more than 70% of spatial variability information? Steeper drops (reduced variance information fidelity) occur above 100 km? This seems like a very useful conclusion which might deserve more attention in the manuscript?

Reply:

We included a discussion of the impact of the results on the modeling community in the conclusions.
